# Supplementary material
Source: publisher site journal article supplement (https://www.dovepress.com/article/361008)

Supplementary Table 1. The primary antibodies for Western blotting.

| Antibody | Catalogue number | Sources |
| --- | --- | --- |
| HDAC9 | ab109446 | abcam |
| Runx2 | bs-1134R | bioss |
| OCN | ab13420 | abcam |
| pERK1/2 | AF3240 | affinity |
| ERK1/2 | AF6240 | affinity |
| β-Actin | ab8226 | abcam |

Supplementary Table 2. 950 overlapped DEGs.

TICAM2 /// TMED7-TICAM2 CD44 SAMD4A KANK1 DLG1 C3orf72 KIF26B ZNF416 SPINK1 ZNF554 EDN1 DHCR24 MEF2D PVRL1 AEN CLK4 CXCL14 CYBA RGMB PLAU CXCL3 NT5DC1 CCDC59 RBM15 LAMA2 HSPB8 EHF ADD3 TAF4B B9D1 GPSM2 ODZ2 DEPDC1B GYS1 UTY BTN2A1 COL4A5 KBTBD8 HIST1H2AG /// HIST1H2AH /// HIST1H2AI /// HIST1H2AK /// HIST1H2AL /// HIST1H2AM RFX5 ZEB1 SLC25A37 HLTF TMCC3 PKP1 ZBTB34 FOXQ1 KLF11 MSH3 CAPNS2 AQP9 FGFR1 NOSTRIN ING3 ZNF208 TET3 UNC5B CD1D TMEM39A RAB40B NR4A2 IGSF3 IKZF5 PROM2 LY6K SORL1 CDH13 CTAGE5 TMEM184A ZFP3 ST6GALNAC5 TP53AIP1 C20orf111 EPS8 FAM209A GPNMB STK25 AKR1B10 CMPK2 RGS16 CDC25B TMEM19 ABL2 PTPRZ1 PSMA1 LIPN ENTPD3 ALKBH1 ANXA8 /// ANXA8L1 /// ANXA8L2 SNIP1 ARL14 CRYM TIMP3 CCDC11 PHACTR3 SNX16 ACACA PPP1R15B WDR69 SQSTM1 CD55 LOC100129518 /// SOD2 VGLL3 DCP1A YOD1 SEL1L3 ATF3 IPO11 /// LRRC70 WDR54 ANKRD10 STARD5 ST3GAL1 ITGB4 BTG1 CNOT4 KATNAL1 DUSP4 PLTP ROR2 LOC554223 COL15A1 DNAJA4 DOCK8 SLC25A1 CACHD1 ARL5B ZNF556 AKIRIN2 FBXO11 ALDH2 ACRC IDI2-AS1 NRARP C1orf63 GSTA4 HSPBAP1 CDKN1B ADH5 LAMP3 TNFSF10 MIER3 FNIP1 CBLL1 MAP3K13 CPEB3 PPM1A SKP2 SYNC PTHLH C12orf50 SON MAFK IL24 DUSP5 ID1 KRTAP3-2 CAPN14 RNF39 NEFM ASS1 ADAMTS9 ZBTB2 TUBBP5 TMEM237 PLXNB1 SPTBN1 IRS1 ZNF24 HSP90B1 /// MIR3652 SFSWAP REC8 FAT2 THAP1 EFCAB7 TCEAL8 VSNL1 TSC22D3 TMEM217 ZNF670 LIN52 ERMP1 FAM24B OVGP1 ARID5B GLIS2 ZNF721 CGA ATP7A CHMP3 /// RNF103-CHMP3 MAL MFAP5 WDR20 IL6R COL7A1 NFIL3 VPS36 HIST1H2BJ CORO2B MIS18BP1 LOC100506965 AKNAD1 GPATCH2 DIDO1 NGDN CXCL11 PLCXD2 IL31RA MYO10 OSR2 PKIB IL1RL1 APOBEC3B SNX10 MGST1 RNF103 AHCY NUPL1 CROT GPRC5C HDAC9 C1orf51 C1orf21 NADSYN1 METTL15 C10orf99 KRT15 FAM175A CRY1 MSX2 PBX1 LPIN3 ZNF425 SYTL1 RNF20 ZBTB43 IFIT2 SH3PXD2A KLF6 CYP4V2 KLKB1 RBBP6 ZNF805 ASAP3 PFN2 CD9 /// LOC100652804 /// LOC100653288 ZC3HAV1 OXCT1 LTBP2 RAB38 COX8C CLTCL1 AHRR STEAP4 IL13RA2 AOC3 MYPN CBLB CXorf58 OAS3 SOX30 ZNF193 FSCN1 /// LOC100653350 ZNF137P KLLN MOSPD1 OAS1 TMEM170A CMYA5 DCTN1 DEFB103A /// DEFB103B DIXDC1 KRTAP3-2 /// KRTAP3-3 LOC646214 /// PAK2 NEDD4L CLDN23 TMEM14A FST ANK2 YY1AP1 CREB5 /// LOC401317 PLA2G4A TMEM79 CREBBP SMAD7 POMZP3 /// ZP3 ELAVL2 ITGB6 COQ10A TUBA1A ABCC2 COL5A2 ZBTB16 MPI FGF7 /// KGFLP1 /// KGFLP2 ZEB1-AS1 ITGAV APOBEC3A /// APOBEC3A_B /// APOBEC3B IL8 IRF7 SERPINB13 UPK1B PCDHB2 TTC3 /// TTC3P1 HSPA6 /// HSPA7 DDX60 AVPI1 ZRANB1 UCA1 SCN4B SERTAD1 HSPA6 GM2A MYCT1 KYNU C7orf53 CYBASC3 CCL20 XAF1 MYH10 HBP1 ENKUR STX11 CA9 DNAJA1 GALNTL2 TRIM34 /// TRIM6-TRIM34 MIR22 /// MIR22HG PCYOX1 OLR1 LYPD3 NPR3 KBTBD11 PARD6G MCM10 P2RY2 GPRC5A DST /// LOC100652766 RGCC SLC6A13 HSPA8 /// SNORD14C /// SNORD14D NT5E FOXN2 CD83 CD200 LRPPRC ITGA6 DIEXF ZNF468 IGFBP2 HNF4G SULF2 ZCCHC10 BMP2 GABARAPL1 UBE2Q2 TAC1 MIR4680 /// PDCD4 NUDT22 LST1 FAM209A /// FAM209B TYMS SLC44A5 IRS2 RIMKLB ZSWIM6 CLCA2 MELK MXRA5 B3GNT5 /// LOC100505668 RND3 HIST1H4A /// HIST1H4B /// HIST1H4C /// HIST1H4D /// HIST1H4E /// HIST1H4F /// HIST1H4H /// HIST1H4I /// HIST1H4J /// HIST1H4K /// HIST1H4L /// HIST2H4A /// HIST2H4B /// HIST4H4 ALDH7A1 PPP1R10 TRIB1 DLEU2 NR1D2 EPSTI1 PTX3 NTPCR TMEM27 GABPB1 PRSS3 BCAR3 MAP3K6 IL36G ANKHD1 /// ANKHD1-EIF4EBP3 ACPP CSRNP1 TRERF1 GART CDH11 MME TEX26 FAM213A KANK4 TINF2 EPC1 GREM1 UBE2L3 BCOR FOXD4 /// FOXD4L1 /// FOXD4L3 /// FOXD4L6 NR4A3 SPDYA BCL11B SPTLC3 ZC3H12C RAB7B DNASE1L1 SEMA4B DYNC2H1 SRP19 UROS KLF9 KRT34 /// LOC100653049 SLC6A14 HOXD1 LAMA3 NR1D1 /// THRA VPS13D LAMA5 KRTAP21-2 GNA13 EGR3 ZNF292 AMOTL2 OASL TNFAIP3 IL12A ARNTL PDK4 DUSP10 TXNIP ELL3 TRIP13 MMP1 CA12 ADA EIF2AK3 TLR3 CAMK2G IL6 CTGF HMGB2 ECI2 FBXL2 EPHX2 SNX7 ATF7IP SLC2A1 SEMA6A CWC25 GMEB2 PTGER4 H1F0 KANSL1L EPHA1 ACOX3 C2orf18 /// CENPA TRIM6 MVP WEE1 CD109 BCL2A1 CKS2 GADD45B ISG15 MX2 ZMYM3 EFEMP1 FGFBP1 AJAP1 RNF213 PARP1 ZNF461 ZNF165 KIAA0040 SLC7A2 CLK1 USP38 MIPEP RIN1 VNN3 CDK18 THAP2 HLCS GPR155 PNISR STX3 LINC00319 RGS2 TGM1 SH3RF2 VPS26B SLC25A25 PDCD6 CNN2 ZC4H2 PRDM8 OGT C7orf10 HMOX1 EPPK1 PPP1R15A MMP28 CITED2 MAN1A1 LOC100652886 /// LOC100653157 /// TGFBI CALML5 AARS2 MOV10 NBEAL2 FEM1C D4S234E DYRK3 HSPA13 TMEM158 BDH1 IKBIP ECM2 LATS2 SELK TAF1A RMND5A HIST2H2BC ZNF555 FLJ23867 /// QSOX1 CRABP2 NCKAP5 KRT80 RORA PNRC2 ZNF365 TRAPPC12 DDIT4 C9orf72 EIF1B FLCN CHM C17orf61-PLSCR3 /// PLSCR3 HERPUD1 BCL2L11 CCNL1 ZNF582 INPP4B INHBA IRAK2 IFI6 SPIN2A /// SPIN2B CYP2S1 FAM198B SDPR HIVEP2 LAMB1 LOXL2 CPEB2 PYGL PDLIM1 FAM65B EPN3 DKK3 NUBPL KLF8 JMJD6 PRKG1 HIBCH PCF11 EIF5 TREM2 DUSP8 /// GLUD1P3 IQCE YRDC THSD7A PTPRF S100A7 /// S100A7A CXCL2 GPR115 ENPP5 NDRG1 FBXO9 MYLK RASGEF1B SNX5 FAM173B CHML ZFP36L1 ANKRD13C IFNK SERPINB4 CHD2 HES6 NR4A1 AQP3 REEP5 TPGS2 FOXA1 ZFC3H1 BRI3 IGFBP6 ZNF844 SDC1 IFI44L RNASE7 DDIT3 IFIT5 FAM46A FOS CALML3 IFIT1 CCL4 /// CCL4L1 /// CCL4L2 HSPA5 ZHX2 ERP27 ALDH8A1 ARMC9 CNTN1 LATS1 ENSA RALA CKAP2 FADS3 PALMD LEMD1 AKAP12 ZNF841 FGF2 CLU VIMP ABCC10 INSL4 HADH OAS2 ENDOD1 IDI1 C12orf35 PLSCR1 TRAF4 ZNF460 LAD1 KHDRBS3 PPIF PRR15 GJB2 THBS1 SIX4 CAV1 GNPDA2 ZNF674 GBP6 NAV1 MOCOS SHISA9 SPINT1 PNMAL1 CHIC2 SLC16A3 CCNE2 CELSR1 DNAJC21 BTBD11 DNAJB9 PRSS23 ETS1 PMAIP1 ISG20 SYNE1 MAPK13 ARPC1B HRH1 SGMS2 FAH ALS2CR8 KIAA1239 MFAP2 H1FX GGCX HTRA1 PDZD2 SLC41A2 LARP1B SPA17 HIST1H2BC /// HIST1H2BE /// HIST1H2BF /// HIST1H2BG /// HIST1H2BI KIAA0895 ZNF34 ID2 FKBP15 SERAC1 ADSL GPX8 RHOQ CYLD ITM2A FAM210A XBP1 HSPA1A /// HSPA1B JMJD1C NFKBIB DKK1 INTS2 SRPX ZNF507 NRIP3 ODC1 THOC6 CTDSPL SOX6 ZCCHC8 FAM82B ARID3B BCDIN3D CDKN1C HSPH1 COL17A1 TSPAN1 LYNX1 DGKA NKAPL LOC100132240 /// MIG7 CXCL10 SLC35G2 ZNF295 FLRT3 SERPINE1 HERC5 ARG2 GLS CCL5 ZNF594 MAN2B2 DNAJB5 FAM83D MAFG EPS8L2 LPAR6 KIAA1024 TM4SF1 CREBRF DHDH RSAD2 ST6GALNAC2 MX1 FGF13 SDE2 WDR41 CASP9 BCCIP HERC4 IQCJ-SCHIP1 /// SCHIP1 KCTD8 LAMP2 CAT HMMR MIS12 NEDD9 PKM HS3ST2 C6orf106 TBC1D15 MAGEA11 CXCL5 ZNF567 SH3BP1 TPM2 S1PR5 ENPP1 NREP MMP25 PPP1R1C GJC1 CELSR2 ATP10D AJUBA RASSF8 FAM217B RNMTL1 FRZB SART3 CARD17 RHPN2 RABGAP1L DLC1 NFYB HSD17B12 ASXL1 IFIH1 RSRC2 LIPA /// LOC100507575 EGLN3 PER1 MANSC1 ZNF77 NNT SHISA2 TCP11L2 SSX2IP AKR1C2 /// LOC100653286 DYX1C1 SIRT1 AKR1B10 /// AKR1B15 ANK3 CAV2 KRT5 SEMA3F PLEKHG1 S100A7 LPCAT3 SP8 HIST1H2AB /// HIST1H2AE TUBGCP5 TPPP FAM82A1 FOXD1 DUSP16 SIAE DDI2 /// RSC1A1 PTPLAD2 BCL11A DEDD2 S100A7A C11orf96 AKR1C3 GKAP1 PKP3 SETX SH3GL2 PVRL3 RNF114 RSPO3 NFKBIA KCTD12 IGFBP3 ZFAND2A PSPC1 ALB ANKRD1 PFKFB4 FMN1 /// LOC100653168 DCN GPR68 SLC9B1 CLIC2 N4BP2L1 HES4 ETNK1 FKBP1A-SDCBP2 /// SDCBP2 ERRFI1 NXPE3 ZXDB FAM70A C14orf2 RSL1D1 CHN1 ADNP2 DOCK7 DNER LPAR1 IFITM1 MAMDC2 GLB1 PDIA4 POPDC3 GEM SERPINA3 ANXA4 NANOS1 YTHDC1 LPPR5 RNASE8 JUN MIR4800 /// MXD4 KCNJ15 NOTCH3 IRF9 MMP10 BACH2 NOTCH2 /// NOTCH2NL ZNF57 ME1 FBXO32 ZNF557 ZFY DLEU2 /// DLEU2L PGM3 IVL PLAUR KIF3C SCG5 RNF128 HSPG2 HORMAD1 GJB4 FBXO2 CYR61 MAFF AMIGO2 PPP4R4 CDKAL1 TRIM36 VAV3 LOC440173 CYP24A1 FXYD3 ZNF697 TBC1D8B FOSL1 NPC1 ZNF776 INSIG1 GULP1 PYCARD PARD6B C1orf162 RBM48 HIST2H2BE NDRG3 PPM1D TP53BP2 GPC1 TP63 LMBR1 IFI44 AOC2 PDLIM5 NUSAP1 BRWD1 RCBTB2 RYBP CNST SLC19A2 AGR2 ABCA13 ARTN NDN LOC154761 MLLT4 IFIT3 KLHL24 EFS DUSP8 CSF2 ARNT2 SMCR8 CBR1 BIRC3 CBFA2T3 LOC100653301 /// NRBP2 WDR63 WLS CDC25A RLF KLF3

Supplementary Figure 1. Identification of DEGs between control groups and HDAC9-knockdown group. **(A)** The heatmap of DEGs between Lenti-control group and HDAC9-knockdown group. **(B)** The heatmap of DEGs between Mock-treated group and HDAC9-knockdown group. **(C)** The intersection of the overlapped DEGs in these two heatmaps, respectively. Set1: Lenti-control group vs HDAC9-knockdown group; Set2: Mock-treated group vs HDAC9-knockdown group.


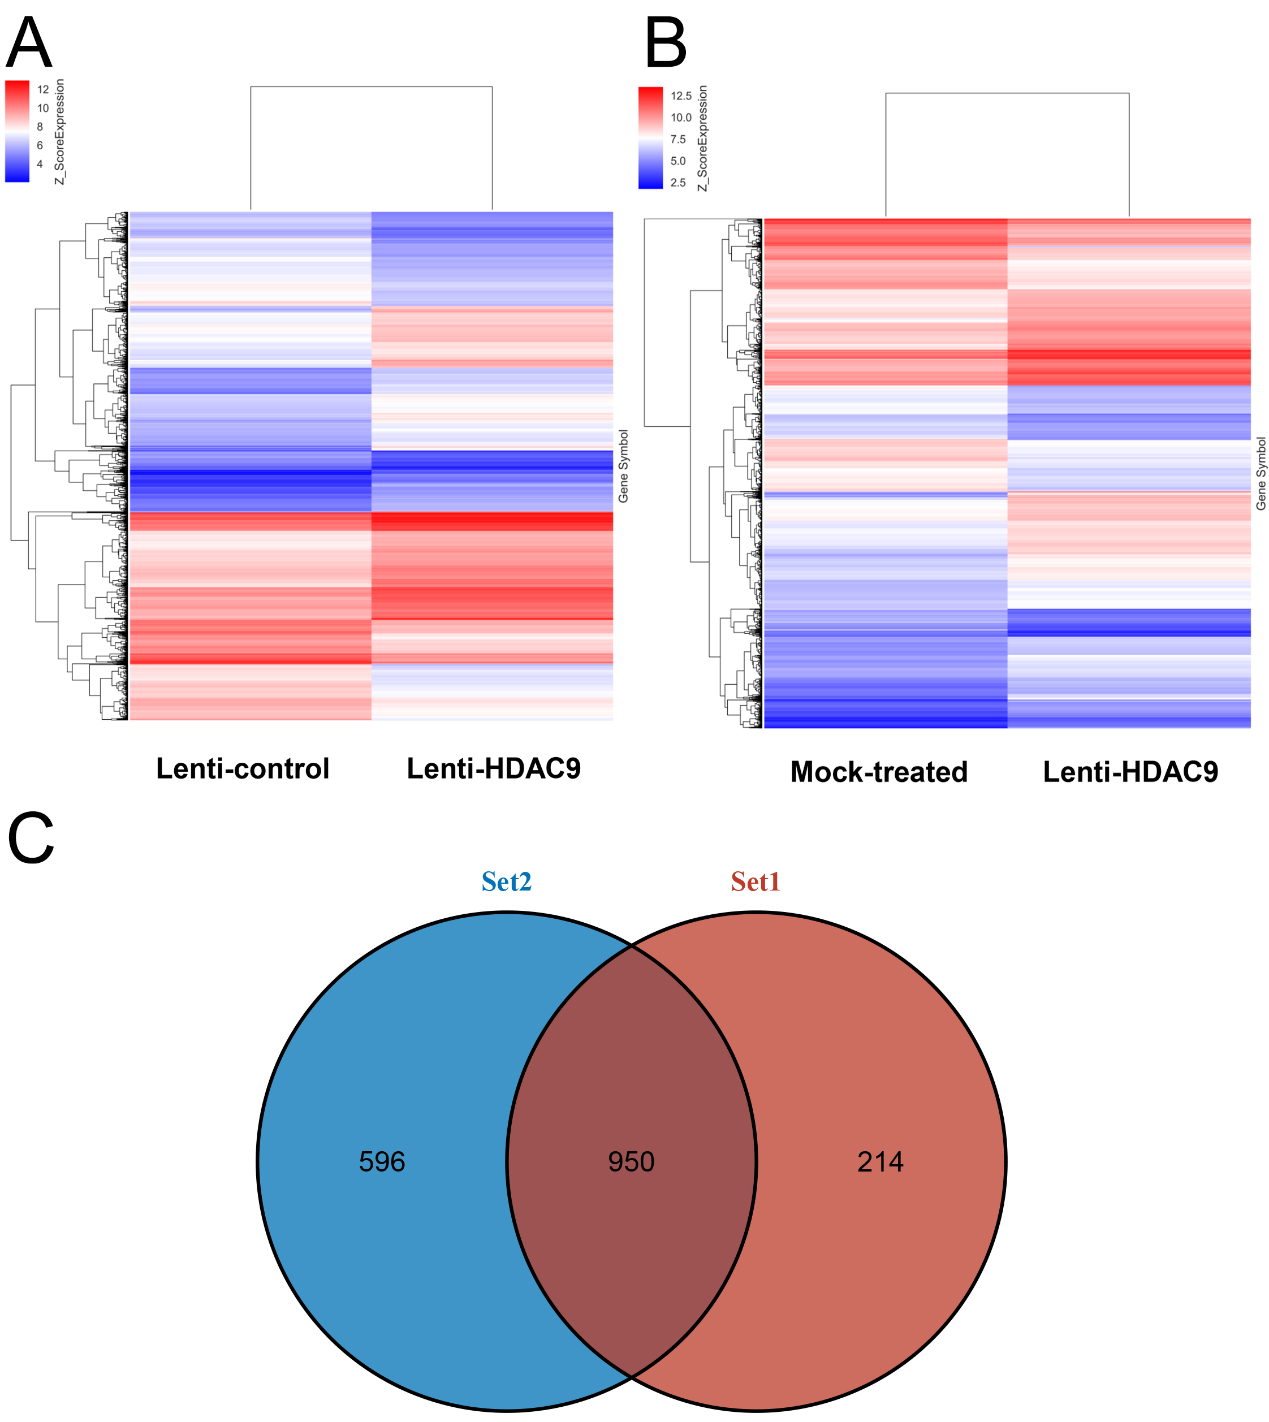

Supplement: Supplementary file 1 [file get_supplementary_file.php]
